# Supplementary material for: Response of Midgut Trypsin- and Chymotrypsin-Like Proteases of Helicoverpa armigera Larvae Upon Feeding With Peanut BBI: Biochemical and Biophysical Characterization of PnBBI
Source: PubMed Central journal article supplement (PMC7105688; doi:10.3389/fpls.2020.00266), 2020-03-24
Supplement: Image_1.pdf [file Image_1.pdf]

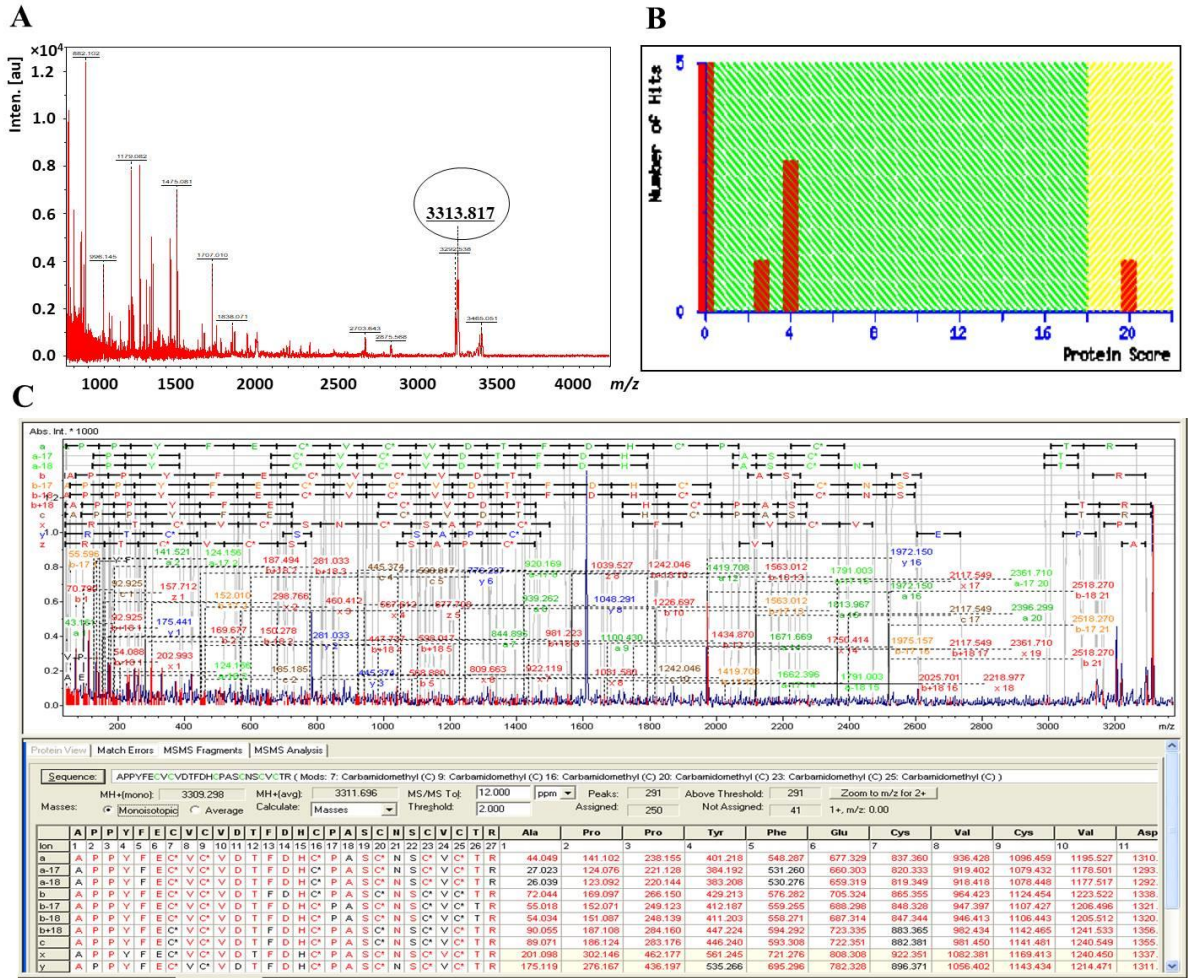

**Supplementary Figure 1. MALDI-TOF-TOF analysis of PnBBI iso inhibitor spot (pI 5.9).** (A) Peptide mass fingerprint (PMF) spectra; (B) Mascot MS-MS ions search result and (C) Lift spectrum from PMF peak with m/z 3313.817 generated by Biotoool software after digestion of PnBBI iso inhibitor spot pI 5.9 with trypsin (please refer **Method section 2.6** to **Fig. 3**).

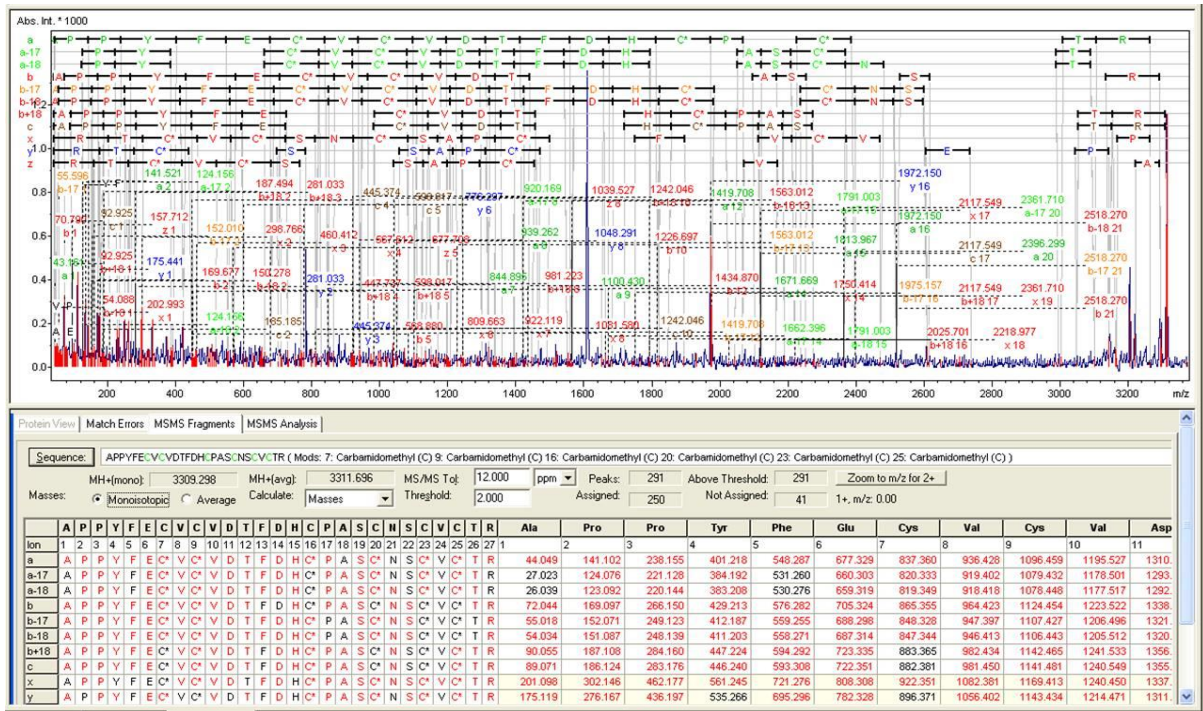

Zoomed spectrum of Supplementary Figure 1C
